## **Maternally inherited differences within mitochondrial Complex I control murine healthspan.**

### **Authors:**

Misa Hirose<sup>1</sup>, Paul Schilf<sup>1</sup>, Kim Zarse<sup>2</sup>, Hauke Busch<sup>3,4</sup>, Georg Füllen<sup>5</sup>, Olaf Jöhren<sup>6</sup>, Rüdiger Köhling<sup>7</sup>, Inke R König<sup>8</sup>, Barbara Richer<sup>9</sup>, Jan Rupp<sup>10</sup>, Markus Schwaninger<sup>11</sup>, Karsten Seeger<sup>9</sup>, Christian Sina<sup>12</sup>, Michael Ristow<sup>2</sup> and Saleh M Ibrahim<sup>1\*</sup>

<sup>1</sup>Luebeck Institute of Experimental Dermatology, University of Luebeck, Luebeck, Germany

<sup>2</sup>Energy Metabolism Laboratory, Institute of Translational Medicine, Swiss Federal Institute of Technology (ETH) Zurich, Schwerzenbach, Switzerland

<sup>3</sup>Group of Systems Biology, Luebeck Institute of Experimental Dermatology, University of Luebeck, Luebeck, Germany

<sup>4</sup>Institute of Cardiogenetics, University of Luebeck, Luebeck, Germany

<sup>5</sup>Institute for Biostatistics and Informatics in Medicine and Ageing Research, Rostock University Medical Center, Rostock, Germany

<sup>6</sup>Center of Brain, Behavior & Metabolism, University of Luebeck, Luebeck, Germany

<sup>7</sup>Oscar-Langendorff-Institute of Physiology, Rostock University Medical Center, Rostock, Germany

<sup>8</sup>Institute of Medical Biometry and Statistics, University of Luebeck, Luebeck, Germany

<sup>9</sup>Institute of Chemistry and Metabolomics, University of Luebeck, Luebeck, Germany

<sup>10</sup>Department of Infectious Diseases and Microbiology, University of Luebeck, Luebeck, Germany

<sup>11</sup>Institute of Experimental and Clinical Pharmacology and Toxicology, University of Luebeck, Luebeck, Germany

<sup>12</sup>Institute for Nutritional Medicine, University of Luebeck, Germany

\*Correspondence to: Saleh M Ibrahim; [Saleh.Ibrahim@uksh.de](mailto:Saleh.Ibrahim@uksh.de)

**Running title:** Complex I in murine healthspan

**Key words:** Conplastic mouse strains, mitochondrially encoded complex I, mitochondrial DNA (mtDNA), lifespan, *mt-Nd2*, healthspan, mice

## Abstract

Mitochondrial complex I, the largest enzyme complex of the mitochondrial oxidative phosphorylation machinery, has been proposed to contribute to a variety of age-related pathological alterations as well as longevity. The enzyme complex-consisting proteins are encoded by both nuclear (nDNA) and mitochondrial DNA (mtDNA). While some association studies of mtDNA-encoded complex I genes and lifespan in humans have been reported, experimental evidence and the functional consequence of such variants is limited to studies using invertebrate models. Here, we present experimental evidence that a homoplasmic mutation in the mitochondrially encoded complex I gene *mt-Nd2* modulates lifespan by altering cellular tryptophan levels and, consequently, ageing-related pathways in mice. A conplastic mouse strain carrying a mutation at m.4738C>A in *mt-Nd2* lived significantly shorter than the controls did. The same mutation led to a higher susceptibility to glucose intolerance induced by high-fat diet feeding. These phenotypes were not observed in mice carrying a mutation in another mtDNA-encoded complex I gene, *mt-Nd5*, suggesting the functional relevance of particular mutations in complex I to ageing and age-related diseases.

## Introduction

Mitochondrial DNA encode genes for 2 ribosomal RNAs and the 22 transfer RNAs, as well as the 13 proteins of mitochondrial respiratory process, i.e., oxidative phosphorylation (OXPHOS) complexes<sup>1,2</sup>. Of the five enzyme complexes of the mitochondrial respiratory process, OXPHOS complex I (NADH:ubiquinone oxidoreductase) is the largest enzyme, and is crucial for cellular metabolism by oxidising NADH and regenerating the NAD<sup>+</sup> pool in the mitochondrial matrix<sup>3</sup>. A deficiency in complex I, caused by either the nuclear-encoded genome or mitochondrial genome (mtDNA) is reportedly associated with mitochondrial disorders both in children and adults, including Leigh syndrome, cardiomyopathy and encephalomyopathies<sup>4,5</sup>.

In addition, the link between mutations in complex I and ageing has been shown in a number of studies using different model systems. Mutations in genes encoding subunits of complex I reportedly increase ROS levels and extend lifespan in worms and flies by independent mechanisms<sup>6,7</sup>. *Nuo-6* (qm200) worms, carrying a mutation in a conserved subunit of complex I, exhibit an extended lifespan by reducing oxygen consumption and decreasing complex I activities<sup>6</sup>. Flies with a knocked down expression of *NDUFS1*, a component of complex I, exhibited a longer lifespan via an increased mitochondrial unfolding protein response and the repression of insulin signalling<sup>7</sup>. Other studies showed that the stability of complex I is a critical factor for the extension of lifespan of mice<sup>8</sup> and worms<sup>9</sup>. In these two studies, opposite theories are suggested. The former indicates that the instability of complex I results in reduced ROS production, which extends the lifespan in mice<sup>8</sup>, while the latter shows that the destabilisation of the complex leads to a shortened lifespan in worms<sup>9</sup>. In addition, a recent study demonstrated that increased ROS production, specifically from complex I reverse electron transport, extends lifespan in flies<sup>10</sup>.

Apart from studies of nuclear genome-encoded complex I genes, mtDNA-encoded complex I genes are also reportedly involved in ageing, and this is supported by several studies exhibiting an association between mitochondrial DNA polymorphisms and lifespan in different

ethnic populations. These include the A variation at m.5178 in the ND2 gene (*MT-ND2*) accumulating in Japanese centenarians<sup>11</sup>, and the A variation at m.9055 in the ATP6 gene (*MT-ATP6*) in French Caucasian centenarians<sup>12</sup>. More recently, a gene-wise analysis of mtDNA in a Turkish population over 90 years of age revealed that non-synonymous mutations in complex I genes were enriched<sup>13</sup>. Interestingly, most of these variants exhibit protective effects against ageing and age-related diseases, such as reduced lipid levels (anti-atherogenic)<sup>14</sup> and protection from Parkinson's disease<sup>15</sup>. In addition, variations in mtDNA encoded complex I genes are reportedly associated with age-related diseases such as metabolic diseases (e.g., type 2 diabetes<sup>16</sup>) and neurodegenerative disorders (e.g., Alzheimer's disease<sup>17</sup> and Parkinson's disease<sup>15</sup>), in humans.

Previous studies using model organisms reveal that mutations in mtDNA-encoded complex I genes controlled lifespan in worms<sup>18</sup> and fruit flies<sup>19</sup>, while no studies have been conducted in mammalian models to date.

Therefore, we evaluated the impact of mtDNA-encoded complex I genes on ageing in mice using conplastic mouse strains carrying different single point homoplasmic mutations in complex I genes on the same nuclear background of *C57BL/6J*, i.e., *C57BL/6J-mt<sup>ALR/LtJ</sup>* (B6-mt<sup>ALR</sup>) and *C57BL/6J-mt<sup>BPL/1J</sup>* (B6-mt<sup>BPL</sup>)<sup>20</sup>. The former carries a homoplasmic mutation in mtDNA-encoded NADH dehydrogenase subunit 2 gene (*mt-Nd2*), and the latter has a homoplasmic mutation in the mtDNA-encoded NADH dehydrogenase subunit 5 gene (*mt-Nd5*). We specifically selected these conplastic strains to compare because they differ only in complex I genes (**Supplementary Table 1**).

## Results

### A mutation in the *mt-Nd2* gene results in a shorter lifespan in mice.

First, to evaluate the impact of mutations in complex I genes on lifespan in mice, we performed a longevity study using a large cohort of the two conplastic mouse strains carrying a mutation in *mt-Nd2* (B6-*mt*<sup>ALR</sup>) and *mt-Nd5* and (B6-*mt*<sup>BPL</sup>). The female B6-*mt*<sup>ALR</sup> mice lived approximately 60 days shorter than the B6-*mt*<sup>BPL</sup> mice did ( $p=0.0400$ , log-rank test; **Fig. 1a** and **Supplementary Table 2**), while this significant difference was not observed in males or a sex-mixed analysis ( $p=0.4923$ , and  $p=0.1532$ , respectively; **Fig. 1b, c**). In both strains, the incidence of spontaneous age-related diseases (i.e., tumours, ulcerative dermatitis and arthritis, **Supplementary Fig. S1a**) and the ageing score (**Supplementary Fig. 1b**) were comparable. The days of vaginal patency and plasma IGF-1 levels in differently aged females showed no difference between the strains (**Supplementary Fig. 1c, d**).

### The *mt-Nd2* mutant mice exhibited mitochondrial functional differences under stress conditions.

Next, we investigated the functional consequence of the *mt-Nd2* variant in the liver mitochondria obtained from the two conplastic mouse strains. The mitochondrial OXPHOS complex activities values were normalised to the individual values of the citrate synthase (CS) activities. No difference was observed in the levels of the OXPHOS complex enzyme activities (values normalized with CS) between the B6-*mt*<sup>BPL</sup> and B6-*mt*<sup>ALR</sup> mice in both age groups, except that there was an age-dependent increase in complex III activity levels in both strains (descriptive  $p=0.0011$ , young B6-*mt*<sup>ALR</sup> vs aged B6-*mt*<sup>ALR</sup>; descriptive  $p=0.0004$ , young B6-*mt*<sup>BPL</sup> vs aged B6-*mt*<sup>BPL</sup>; one-way ANOVA, **Fig. 2a**). A Western blot analysis of the heart proteins prepared from the young (3 to 4 months of age) and aged (18 to 22 months of age) mice revealed unaltered levels of the OXPHOS complex subunit proteins between the strains in both age groups (**Fig. 2b**). The protein levels of 3 other subunits of mitochondrial

complex I protein levels were also evaluated, and no differences was observed between the strains regardless their age group (**Fig. 2c**).

Primary skin fibroblasts were isolated from the B6-mt<sup>BPL</sup> and B6-mt<sup>ALR</sup> mice, and skin fibroblasts cell lines (B6-mt<sup>BPL</sup> and B6-mt<sup>ALR</sup>) were generated from these primary fibroblasts. Each cell line carried the distinct mtDNA mutations as those in parental mouse strain (**Supplementary Table 1**). A cellular flux analysis of the conplastic fibroblast cell lines demonstrated that the levels of maximal respiration and the spare capacity in B6-mt<sup>ALR</sup> fibroblasts exhibited a decreasing trend compared to those in the B6-mt<sup>BPL</sup> fibroblasts (**Fig. 2d**).

Next, primary lymphocytes were isolated from the B6-mt<sup>BPL</sup> and B6-mt<sup>ALR</sup> mice, and the mitochondrial superoxide levels were measured by flow cytometry using MitoSOX at the basal (i.e., immediately after the preparation) and immunologically activated (i.e., 24 hours after culturing with anti-CD3/anti-CD28 antibodies) status. The activated cells from the B6-mt<sup>ALR</sup> mice produced less mitochondrial superoxide than did those from B6-mt<sup>BPL</sup> mice (descriptive  $p < 0.0001$ , two-way ANOVA; **Fig. 2e** left). The fold change of increase for superoxide production was lower in the B6-mt<sup>ALR</sup> lymphocytes than that in the B6-mt<sup>BPL</sup> cells (descriptive  $p = 0.0005$ ,  $t$  test; **Fig. 2e**, right). The mitochondrial membrane potential (MMP) was measured using the same batch of primary lymphocytes used for the superoxide assay. The MMP was increased by the activation, while no difference in the levels of MMP was observed between the strains (**Fig. 2f**, left). When the fold change of the MMP levels upon the activation was compared, the B6-mt<sup>ALR</sup> primary lymphocytes were less abundant than were the B6-mt<sup>BPL</sup> lymphocytes (descriptive  $p = 0.0445$ ,  $t$  test; **Fig. 2f**, right).

### **Higher levels of tryptophan were observed in the cells carrying the *mt-Nd2* mutation.**

The regeneration of NAD<sup>+</sup> is one of the critical functions of mitochondrial complex I. To evaluate whether mutations in complex I affect this function, we determined the NAD<sup>+</sup> and

NADH levels in the liver tissues obtained from the B6-*mt*<sup>BPL</sup> and B6-*mt*<sup>ALR</sup> mice. No difference was observed in the NAD<sup>+</sup>/NADH ratio between the strains (**Fig. 3a, Supplementary Fig. 2a**). To also obtain insights into the biosynthetic pathways leading to NAD<sup>+</sup>, the levels of tryptophan, an essential amino acid, which is degraded into NAD<sup>+21</sup>, was determined by NMR in the skin fibroblast conplastic cell lines carrying the *mt-Nd5* mutation or the *mt-Nd2* mutation (**Fig. 3b**). The levels of tryptophan in the cells carrying the *mt-Nd2* mutation were identified to be higher than those in *mt-Nd5* mutant cells (descriptive  $p=0.0295$ , *t* test; **Fig. 3b, c**), suggesting the m.4738C>A mutation may have an impact on tryptophan metabolism, without altering NAD<sup>+</sup> levels.

### **Ageing-related pathways and mitochondrial functional pathways are altered in *mt-Nd2* mutant mice.**

Next, we performed RNA-seq on the liver-isolated RNA obtained from the female B6-*mt*<sup>BPL</sup> and B6-*mt*<sup>ALR</sup> mice at the age of 3 to 4 months to elucidate the pathways involved in the *mt-Nd2*-related phenotypes. Of the 13967 expressed genes, 35 genes were differentially expressed between the B6-*mt*<sup>BPL</sup> and B6-*mt*<sup>ALR</sup> mice ( $q<0.05$ ; **Fig. 4a, Data S1**). The genes up-regulated in the B6-*mt*<sup>ALR</sup> mice included *G0s2*, *Leap2*, *Usmg5*, *Chchd1* and ribosomal protein genes (**Data S1**). *G0s2*, a G0/G1 switch gene 2, shows an inhibitory capacity for the lipolytic enzyme adipose triglyceride lipase (ATGL)<sup>22</sup>, and the deletion of *G0s2* ameliorates high-fat diet induced body weight gain and insulin resistance<sup>23</sup>. *Leap2* (liver-expressed antimicrobial peptide 2) was recently revealed as an endogenous antagonist of the ghrelin receptor, controlling the blood glucose levels depending upon the nutrient status<sup>24</sup>, and *Usmg5* (upregulated during skeletal muscle growth 5) is also increased in B6-*mt*<sup>ALR</sup> mice. The gene encodes the protein USMG5, which is also called DAPIT (diabetes-associated protein in insulin-sensitive tissues). This protein was initially discovered in insulin-sensitive tissues of the streptozotocin-induced diabetic rats<sup>25</sup>, and its expression is reportedly higher in cells with a highly aerobic metabolism<sup>26</sup>. These findings indicate that the mutation in *mt-Nd2*



has an influence on lipid and glucose metabolism, as well as ATP production in the respiratory chain. *Chchd1* (coiled-coil-helix-coiled-coil-helix domain-containing 1) is one of the recently identified mitochondrial ribosomal proteins, MRPS37<sup>27</sup>, suggesting that the *mt-Nd2* variant affects mitochondrially encoded protein expression as well.

Pathways up-regulated in the short-lived B6-*mt*<sup>ALR</sup> mice included the OXPHOS, MYC target, fatty acid metabolism, E2F target, and mTORC1 signalling pathways (**Fig. 4b**). The oncogene MYC reportedly targets genes involved in mitochondrial biogenesis, i.e., protein import, complex assembly, mitochondrial transcription/translation<sup>28</sup>. Recent studies showed that E2F regulates genes involved in mitochondrial functions via directly binding to their promoter regions (e.g., COX8 and CYB5-M), and through interactions with key regulatory factors of mitochondrial biogenesis, such as NRF1/2 and PGC-1 beta<sup>29</sup>. These pathway analysis data are in line with the phenotypes observed in the B6-*mt*<sup>ALR</sup> mice, i.e., shorter lifespan (**Fig. 1**) and altered mitochondrial functions (**Fig. 2**). An additional pathway analysis using a different database also pointed in the same direction, i.e., the up-regulation of mitochondrial bioenergetics in B6-*mt*<sup>ALR</sup> mice (**Supplementary Fig. 3a, b**)

### **Earlier onset of glucose intolerance is induced by high-fat diet feeding in B6-*mt*<sup>ALR</sup> mice.**

Lastly, to investigate whether the lifespan-linked *mt-Nd2* mutation also contributes to other age-related phenotypes, we induced a diet-induced diabetes model in the female B6-*mt*<sup>ALR</sup> and B6-*mt*<sup>BPL</sup> mice. The high-fat diet (HFD) or control diet (CD) were started when mice were 4 weeks old. The HFD-fed mice acquired more body mass than did those fed the CD, while there was no strain difference in the HFD- nor CD- fed mice (**Fig. 5a**). After 8 weeks of HFD feeding, an intraperitoneal glucose tolerance test (IPGTT) was performed, and the levels of glucose intolerance in the B6-*mt*<sup>ALR</sup> mice were higher than those in the B6-*mt*<sup>BPL</sup> mice, with a different time course in both strains (main effect of the strains: descriptive  $p=0.0238$ ,

interaction between strains and time: descriptive  $p < 0.0001$ , two-way non-parametric analysis of variance; **Fig. 5b**).

The levels of glucose and insulin in the morning-fasted serum samples were comparable between the two strains in the HFD-fed (**Fig. 5c**), CD-fed groups (**Supplementary Fig. 4c**), and in random-fed groups (**Supplementary Fig. 4d**). The fructosamine levels were also unaltered between the random-fed B6- $mt^{BPL}$  and B6- $mt^{ALR}$  mice (**Supplementary Fig. 4d**), confirming that the basal glucose levels are similar between the strains. The lipid parameter assays revealed that the levels of total cholesterol in the HFD-fed mice mildly increased (**Fig. 5d**) compared with those in the CD-fed mice (**Supplementary Fig. 4e**) and random-fed mice (**Supplementary Fig. 4f**). Interestingly, the levels of total cholesterol and high-density cholesterol (HDL) were lower in the HFD-fed B6- $mt^{ALR}$  mice than those in the HFD-fed B6- $mt^{BPL}$  mice (descriptive  $p = 0.0057$  and  $0.0038$ , respectively,  $t$  test; **Fig. 5d**), while the levels of low-density cholesterol (LDL) were unaltered, resulting in a lower ratio of HDL to LDL in the B6- $mt^{ALR}$  mice compared to that in the B6- $mt^{BPL}$  mice (descriptive  $p = 0.0054$ ,  $t$  test; **Fig. 5d**). Changes in total cholesterol and the ratio of HDL to LDL were not detected in the CD-fed groups and random-fed groups (**Supplementary Fig. 4e, f**). Despite the unchanged triglyceride levels between the HFD-fed B6- $mt^{ALR}$  and HFD-fed B6- $mt^{BPL}$  mice, we observed that HFD-fed B6- $mt^{ALR}$  mice exhibited lower levels of free fatty acid than did the HFD-B6- $mt^{BPL}$  mice (descriptive  $p = 0.0115$ ,  $t$  test; **Fig. 5c**), but this did not occur in the CD-fed mice (**Supplementary Fig. 4e**), suggesting impaired beta oxidation in the B6- $mt^{ALR}$  mice under metabolic stress.

Cellular flux analysis was assessed in the primary hepatocytes isolated from the mice fed with HFD over 8 weeks, indicating the lower levels of basal respiration (descriptive  $p = 0.0389$ ,  $t$  test; **Figure 5e**) and OXPHOS-linked ATP levels (descriptive  $p = 0.0446$ ,  $t$  test; **Fig. 5f**) in the cells prepared from the B6- $mt^{ALR}$  mice than those in the cells from the B6- $mt^{BPL}$  mice.

We also observed a mildly delayed glucose clearance in the CD-fed B6- $mt^{ALR}$  compared to that of the CD-fed B6- $mt^{BPL}$  mice again with a different time course in both strains (main

effect of the strains: descriptive  $p=0.0062$ , interaction between the strains and time: descriptive  $p=0.0017$ , two-way non-parametric analysis of variance; **Supplementary Fig. 4a**). Furthermore, two independent IPGTT experiments, using regular-chow-fed B6- $mt^{BPL}$  and B6- $mt^{ALR}$  mice, demonstrated a pattern of glucose clearance that was similar to that of the CD-fed mice (main effect of the strains: descriptive  $p=0.3062$ , interaction between the strains and time: descriptive  $p=0.0056$ , two-way non-parametric analysis of variance, **Supplementary Fig. 4b**), confirming that the impaired glucose metabolism was caused by the mutation in *mt-Nd2*. In line with this result, an indirect calorimetric cage analysis of the regular-chow-fed B6- $mt^{BPL}$  and B6- $mt^{ALR}$  mice showed lower levels of respiratory exchange ratio (RER) in the B6- $mt^{ALR}$  mice compared with those in the B6- $mt^{BPL}$  mice, indicating the preference of fat to glucose as an energy source in the B6- $mt^{ALR}$  mice (descriptive  $p=0.0382$ , *t* test, **Supplementary Fig. 4g**). We did not observe any difference in energy expenditure, locomotor activity, or food intake levels other than water intake (**Supplementary Fig. 4 h-k**).

## Discussion

In the present study, we presented experimental evidence that variations in mtDNA-encoded complex I genes, i.e., *mt-Nd2* and *mt-Nd5*, differentially affected lifespan and metabolic phenotypes in mammals. Our results are in line with previously reported studies using *Drosophila* carrying a mutation in the ND2 gene (*ND2<sup>del1</sup>*), i.e., shorter lifespan as well as impaired fat storage, apart from Leigh syndrome-like (or spontaneous) neurological dysfunction<sup>19,30</sup>. These studies suggested that ND2 mutations led to the shorter lifespan.

Mitochondrial functional studies using liver-mitochondria, cellular and tissue proteins did not exhibit major differences at the basal levels between the B6-mt<sup>ALR</sup> and B6-mt<sup>BPL</sup> mice. However, once the cells received additional stimuli, i.e., immunological- (for lymphocytes) or metabolic stress (for hepatocytes), the levels of oxygen consumption, OXPHOS-linked ATP production and mitochondrial superoxide were significantly lower in the B6-mt<sup>ALR</sup> mice than those in the B6-mt<sup>BPL</sup> mice. This effect is likely caused by the lower levels of spare capacity and maximal respiration in the B6-mt<sup>ALR</sup> mice. In addition, glucose and lipid metabolism were skewed in this mouse strain. These alterations potentially resulted in a shorter lifespan and a higher susceptibility to diet-induced glucose intolerance in the B6-mt<sup>ALR</sup> mice. Interestingly the RNA-seq data pointed that the pathways involved in the *mt-Nd2* mutant mice were mitochondrial pathways, e.g., OXPHOS pathways and metabolic pathways, as well as the ageing-related mammalian target of rapamycin (mTOR) pathway.

Another potential functional consequence of the *mt-Nd2* variant in the B6-mt<sup>ALR</sup> mice was the altered levels of tryptophan, but not NAD<sup>+</sup> levels. Tryptophan is an essential amino acid that is metabolised by the kynurenine pathway through a series of metabolic reactions, and consequently NAD<sup>+</sup> is synthesised<sup>31</sup>. Tryptophan is only obtained through dietary intake, and no difference was observed in the levels of food intake between the strains in our indirect calorimetric cage data. This result suggests that the higher levels of tryptophan were due to the intrinsic metabolic alteration in the B6-mt<sup>ALR</sup> mice. A previous study demonstrates that tryptophan induces the phosphorylation of the mTOR, and accelerates non-alcoholic fatty

liver disease in mice<sup>32</sup>, suggesting that the higher levels of tryptophan may contribute to shorten the lifespan in the B6-*mt*<sup>ALR</sup> mice by activating the mTOR pathway, which is in line with our RNA-seq data.

Interestingly, the m.4738C>A mutation, which is carried by the B6-*mt*<sup>ALR</sup> mice, causes the amino acid substitution of leucine to methionine at the 276<sup>th</sup> peptide (Leu276Met). The 276<sup>th</sup> peptide of human ND2 is also leucine, and this residue is known as the binding site for 1,2-dioleoyl-sn-glycero-3-phosphoethanolamine

(<https://www.ebi.ac.uk/pdbe/entry/pdb/5xtc/protein/17>), suggesting that the mutation could potentially affect the binding capacity and/or affinity to glycerolipids, which are the components of the mitochondrial inner membrane. It is tempting to speculate that the *mt-Nd2* mutation alters the structure of mitochondrial complex I, or super-complex, which may change its function, particularly under stress conditions, without influencing the protein levels of complex I subunits. A study to confirm the structural alteration by the *mt-Nd2* mutation (m.4738C>A) will be performed in the future.

In humans, variants in the *MT-ND2* gene, particularly m.5178C>A, exhibit a link with longevity<sup>11</sup> as well as lipid metabolism<sup>14</sup> and the incidence of age-related diseases, e.g., Parkinson's disease<sup>33</sup>. For this particular variant, the A allele is associated with extreme longevity and is protective for the abovementioned diseases, suggesting that lifespan-associated mtDNA variants are also responsible for age-related disease susceptibility. In the present study, we demonstrated that the B6-*mt*<sup>ALR</sup> mice, carrying the *mt-Nd2* (m.4738C>A) variant, showed a significantly shorter lifespan and a higher susceptibility to diet-induced glucose intolerance than did the B6-*mt*<sup>BPL</sup> mice, which carry the wild-type C allele at m.4378 in *mt-Nd2* and the mutant C allele at m.11902 in *mt-Nd5*. While the effect of each SNP appears to be variable in different species, it is clear that variations in the ND2 genes are strongly linked with ageing and age-associated diseases both in mice and humans.

## Methods

**Mice and husbandry.** Conplastic mouse strains,  $C57BL/6J\text{-}mt^{ALR/LtJ}$  and  $C57BL/6J\text{-}mt^{BPL/1J}$  were previously generated<sup>20</sup>.  $C57BL/6J\text{-}mt^{ALR/LtJ}$  and  $C57BL/6J\text{-}mt^{BPL/1J}$  with a backcross of 13 to 18 ( $C57BL/6J\text{-}mt^{ALR/LtJ}$ ) and 17 to 19 ( $C57BL/6J\text{-}mt^{BPL/1J}$ ) generations were used for the survival study. To genotype nuclear genome of both  $C57BL/6J\text{-}mt^{ALR/LtJ}$  and  $C57BL/6J\text{-}mt^{BPL/1J}$  we used the MegaMUGA Mouse Universal Genotyping Array (77,800 SNPs) as described below, and greater than 99.9% of SNPs were identical to those of  $C57BL/6J$ .

Mice had *ad libitum* access to filtered water and autoclaved pellet diet (Altromin, Eastern-Westphalia/Lippe, Germany). The animal facility was maintained at 21 °C on a 12 h light- 12 h dark- cycle. Mice were allocated into two study groups: longitudinal study group to evaluate lifespan, and cross-sectional study group to evaluate the mice at different ages.

For the high fat diet feeding experiment, eight female mice of  $C57BL/6J\text{-}mt^{ALR/LtJ}$  and  $C57BL/6J\text{-}mt^{BPL/1J}$  at four weeks of age were fed a high fat diet (EF D12492 (I) 60 kJ% fat, Ssniff, Soest, Germany), while three age- and sex-matched mice of each strain were fed a control diet (EF D12450B mod. LS 13 kJ% fat, Ssniff) over eight weeks.

Animal use and all protocols used in this study were approved by local authorities of the Animal Care and Use Committee (V242-7224. 122-5, and 5-1/16, Kiel, Germany) and performed in accordance with the relevant guidelines and regulations by certified personnel.

**Lifespan study and determining age at death.** Eighty two female  $C57BL/6J\text{-}mt^{ALR/LtJ}$ , 82 female  $C57BL/6J\text{-}mt^{BPL/1J}$ , male 99  $C57BL/6J\text{-}mt^{ALR/LtJ}$ , and 94 male  $C57BL/6J\text{-}mt^{BPL/1J}$  were used to evaluate their lifespan, assuring a statistical power to detect a 10% difference in lifespan at a significance level of 0.05 and a power of 0.8 using G\*Power<sup>34</sup>.

**Female sexual maturity.** Vaginal patency was evaluated as previously described<sup>35</sup>.

**Plasma IGF-1 levels.** Plasma IGF-1 levels were measured by a commercially available ELISA kit (Mouse/Rat IGF-1 Quantikine ELISA Kit, R&S Systems, Wiesbaden-Nordenstadt, Germany), according to the manufacturer's protocol.

**Statistical analysis.** Survival curves were estimated using the Kaplan-Meier method, and median lifespans with 95% confidence intervals were calculated. The differences of longevity between the strains were analysed using the log-rank method, as sensitivity analysis, Peto and Peto modification of the Gehan test. The R package survival in R version 3.5 was utilized for this<sup>36</sup>. Assuming that a most pronounced effect is visible in female mice and our previous studies demonstrating the impact of mtDNA variants on lifespan is more prominent in females<sup>37</sup>, the difference between strains in females was tested first. In a hierarchical way, difference between strains in males and in the sex-combined samples was tested for significance only in case that the previous test was significant at a significance level of 0.05.

Differences in glucose between strains and across time points were compared using a non-parametric analysis of variance for repeated in measures using the package nparLD in R, version 3.5. The effect of strain and age on IGF-1 was investigated in a linear regression model.

Statistical analyses for other functional studies were performed using GraphPad Prism (GraphPad Software), and statistical tests used for analysis are indicated in the figure legends.

Statistical tests were performed only for descriptive purposes, and descriptive  $p$ -values are reported.

## Acknowledgements

The authors thank Ann-Kathrin Brethak, Miriam Daumann, Miriam Freitag, Petra Langenstrassen, and Ines Stölting for excellent technical assistance. We also thank Junping Yin and Yask Gupta for their support for the mtDNA sequencing and the data analysis. This work was supported by Bundesministerium für Bildung und Forschung (BMBF, 0315892B), DFG (EXC306), University of Lübeck (P01-2012), as well as by the Swiss National Science Foundation (*Schweizerischer Nationalfonds*, SNF 31003A\_156031) the Horizon 2020 program of the European Union (M.R.).

## Authors contributions

M.H. and S.M.I. designed the study. M.H. and P.S. performed the lifespan study, mitochondrial functional study, other mouse experiments as well as mitochondrial genome sequencing experiments, and analysed the data. K.Z. and M.R. performed plasma parameter assay. I.R.K. conducted the statistical analysis of the survival data. H.B. analysed transcriptome data. G.F. contributed to the interpretation of the transcriptome data. J.R. and C.S. contributed to the interpretation of the mitochondrial functional data. O.J., R.K., and M.S. contributed to the interpretation of the indirect calorimetric cage analysis. B.R. and K.S. performed NMR experiments and analysed the data. K.Z. and M.R. contributed to the interpretation of the metabolic phenotyping data. M.H., M.R. and S.M.I. wrote the manuscript with contributions from all other authors. S.M.I. directed the study.

## Conflict of Interest

Authors have no conflict of interests.



## References

1. Anderson, S. *et al.* Sequence and organization of the human mitochondrial genome. *Nature* **290**, 457–465 (1981).
2. Wallace, D. C. A mitochondrial paradigm of metabolic and degenerative diseases, aging, and cancer: a dawn for evolutionary medicine. *Annu. Rev. Genet.* **39**, 359–407 (2005).
3. Hirst, J. Mitochondrial complex I. *Annu. Rev. Biochem.* **82**, 551–575 (2013).
4. Janssen, R. J. R. J., Nijtmans, L. G., van den Heuvel, L. P. & Smeitink, J. A. M. Mitochondrial complex I: structure, function and pathology. *J. Inherit. Metab. Dis.* **29**, 499–515 (2006).
5. DiMauro, S. & Schon, E. A. Mitochondrial respiratory-chain diseases. *N. Engl. J. Med.* **348**, 2656–2668 (2003).
6. Yang, W. & Hekimi, S. Two modes of mitochondrial dysfunction lead independently to lifespan extension in *Caenorhabditis elegans*. *Aging Cell* **9**, 433–447 (2010).
7. Owusu-Ansah, E., Song, W. & Perrimon, N. Muscle mitohormesis promotes longevity via systemic repression of insulin signaling. *Cell* **155**, 699–712 (2013).
8. Miwa, S. *et al.* Low abundance of the matrix arm of complex I in mitochondria predicts longevity in mice. *Nat Commun* **5**, (2014).
9. Pujol, C. *et al.* Succinate dehydrogenase upregulation destabilize complex I and limits the lifespan of gas-1 mutant. *PLoS ONE* **8**, e59493 (2013).
10. Scialò, F. *et al.* Mitochondrial ROS Produced via Reverse Electron Transport Extend Animal Lifespan. *Cell Metab.* **23**, 725–734 (2016).
11. Tanaka, M., Gong, J. S., Zhang, J., Yoneda, M. & Yagi, K. Mitochondrial genotype associated with longevity. *Lancet* **351**, 185–186 (1998).
12. Ivanova, R., Lepage, V., Charron, D. & Schächter, F. Mitochondrial genotype associated with French Caucasian centenarians. *Gerontology* **44**, 349 (1998).
13. Guney, O., Ak, H., Atay, S., Ozkaya, A. B. & Aydin, H. H. Mitochondrial DNA polymorphisms associated with longevity in the Turkish population. *Mitochondrion* **17**, 7–13 (2014).

14. Kokaze, A. *et al.* Association of the mitochondrial DNA 5178 A/C polymorphism with serum lipid levels in the Japanese population. *Hum. Genet.* **109**, 521–525 (2001).
15. van der Walt, J. M. *et al.* Mitochondrial polymorphisms significantly reduce the risk of Parkinson disease. *Am. J. Hum. Genet.* **72**, 804–811 (2003).
16. Ohkubo, E. *et al.* A patient with type 2 diabetes mellitus associated with mutations in calcium sensing receptor gene and mitochondrial DNA. *Biochem. Biophys. Res. Commun.* **278**, 808–813 (2000).
17. Lakatos, A. *et al.* Association between mitochondrial DNA variations and Alzheimer's disease in the ADNI cohort. *Neurobiol. Aging* **31**, 1355–1363 (2010).
18. Dillin, A. *et al.* Rates of Behavior and Aging Specified by Mitochondrial Function During Development. *Science* **298**, 2398–2401 (2002).
19. Burman, J. L. *et al.* A Drosophila model of mitochondrial disease caused by a complex I mutation that uncouples proton pumping from electron transfer. *Dis Model Mech* **7**, 1165–1174 (2014).
20. Yu, X. *et al.* Dissecting the effects of mtDNA variations on complex traits using mouse conplastic strains. *Genome Res.* **19**, 159–165 (2009).
21. Badawy, A. A.-B. Kynurenine Pathway of Tryptophan Metabolism: Regulatory and Functional Aspects. *Int J Tryptophan Res* **10**, 1178646917691938 (2017).
22. Yang, X. *et al.* The G(0)/G(1) switch gene 2 regulates adipose lipolysis through association with adipose triglyceride lipase. *Cell Metab.* **11**, 194–205 (2010).
23. El-Assaad, W. *et al.* Deletion of the gene encoding G0/G 1 switch protein 2 (G0s2) alleviates high-fat-diet-induced weight gain and insulin resistance, and promotes browning of white adipose tissue in mice. *Diabetologia* **58**, 149–157 (2015).
24. Ge, X. *et al.* LEAP2 Is an Endogenous Antagonist of the Ghrelin Receptor. *Cell Metab.* **27**, 461-469.e6 (2018).
25. Päivärinne, H. & Kainulainen, H. DAPIT, a novel protein down-regulated in insulin-sensitive tissues in streptozotocin-induced diabetes. *Acta Diabetol* **38**, 83–86 (2001).

26. Kontro, H., Hulmi, J. J., Rahkila, P. & Kainulainen, H. Cellular and tissue expression of DAPIT, a phylogenetically conserved peptide. *Eur J Histochem* **56**, e18 (2012).
27. Koc, E. C. *et al.* Identification and characterization of CHCHD1, AURKAIP1, and CRIF1 as new members of the mammalian mitochondrial ribosome. *Front Physiol* **4**, 183 (2013).
28. Morrish, F. & Hockenbery, D. MYC and mitochondrial biogenesis. *Cold Spring Harb Perspect Med* **4**, (2014).
29. Benevolenskaya, E. V. & Frolov, M. V. Emerging links between E2F control and mitochondrial function. *Cancer Res* **75**, 619–623 (2015).
30. Wang, A., Mouser, J., Pitt, J., Promislow, D. & Kaeberlein, M. Rapamycin enhances survival in a *Drosophila* model of mitochondrial disease. *Oncotarget* **7**, 80131–80139 (2016).
31. van der Goot, A. T. & Nollen, E. A. A. Tryptophan metabolism: entering the field of aging and age-related pathologies. *Trends Mol Med* **19**, 336–344 (2013).
32. Osawa, Y. *et al.* L-tryptophan-mediated enhancement of susceptibility to nonalcoholic fatty liver disease is dependent on the mammalian target of rapamycin. *J. Biol. Chem.* **286**, 34800–34808 (2011).
33. Gusdon, A. M. *et al.* Association of the mt-ND2 5178A/C polymorphism with Parkinson's disease. *Neurosci. Lett.* **587**, 98–101 (2015).
34. Faul, F., Erdfelder, E., Lang, A.-G. & Buchner, A. G\*Power 3: a flexible statistical power analysis program for the social, behavioral, and biomedical sciences. *Behav Res Methods* **39**, 175–191 (2007).
35. Yuan, R. *et al.* Genetic coregulation of age of female sexual maturation and lifespan through circulating IGF1 among inbred mouse strains. *Proc. Natl. Acad. Sci. U.S.A.* **109**, 8224–8229 (2012).
36. R Core Team. *R: A Language and Environment for Statistical Computing.* (2018).
37. Hirose, M. *et al.* Low-level mitochondrial heteroplasmy modulates DNA replication, glucose metabolism and lifespan in mice. *Sci Rep* **8**, 5872 (2018).

## Figure legends

### Fig. 1: Lifespan study of B6-*mt*<sup>ALR</sup> and B6-*mt*<sup>BPL</sup> mice.

**a-c** Survival curve of B6-*mt*<sup>ALR</sup> and B6-*mt*<sup>BPL</sup> mice. Females (**a**), males (**b**) and both sexes (**c**).

### Fig. 2: Mitochondrial functional consequence of the mutation in *mt-Nd2* in B6-*mt*<sup>ALR</sup> mice.

**a** Oxidative phosphorylation (OXPHOS) complex activities were measured in liver mitochondria isolated from B6-*mt*<sup>BPL</sup> and B6-*mt*<sup>ALR</sup> mice. OXPHOS activities were normalized to each citrate synthase (CS) activities. No significant difference in activities were detected between the strains in both age groups. Activities in complex III normalised to CS activities were increased in aging in both strains, however, no difference was observed between strains. BPL; B6-*mt*<sup>BPL</sup>, ALR; B6-*mt*<sup>ALR</sup>, young; 3 to 4 months old mice, old; 18 to 22 months old. N=15 (BPL, young), n=14 (ALR, young), n=4 (BPL, aged), and n=3 (ALR, aged). Descriptive  $p = 0.0011$  (BPL, young vs. BPL, aged), descriptive  $p = 0.0004$  (ALR, young vs. ALR, aged), one-way ANOVA.

**b** Quantified values of Western blotting of heart samples showed comparable protein levels of mitochondrial OXPHOS subunits. BPL; B6-*mt*<sup>BPL</sup>, ALR; B6-*mt*<sup>ALR</sup>, young; 3 to 4 months old mice, old; 18 to 22 months old. N=6 in each group.

**c** Levels of other complex I subunit proteins, i.e. NDUFA1, NDUF3, and GRIM19, were unaltered in both strains. Same samples tested in **b** were evaluated.

**d** Oxygen consumption was evaluated in skin fibroblast cell lines generated from B6-*mt*<sup>BPL</sup> and B6-*mt*<sup>ALR</sup>. The levels of maximal respiration and spare capacity showed a trend of less in B6-*mt*<sup>ALR</sup> fibroblasts compared with B6-*mt*<sup>BPL</sup> cells.

**e** Mitochondrial superoxide was measured in primary lymphocytes immediately after the isolation (base, 0h) and 24h-activation with anti-CD3 and anti-CD28 antibodies. Activated lymphocytes from B6-*mt*<sup>ALR</sup> produced significantly less mitochondrial superoxide than those from B6-*mt*<sup>BPL</sup>. The fold change of the MitoSOX levels by activation was significantly lower in B6-*mt*<sup>ALR</sup> cells than B6-*mt*<sup>BPL</sup> cells. Values from viable cell population that were negative for Annexin V were taken for the analysis. descriptive  $p < 0.0001$ , two-way ANOVA (left). descriptive  $p = 0.0005$ ,  $t$  test (right).  $N = 9$  (B6-*mt*<sup>BPL</sup>),  $n = 6$  (B6-*mt*<sup>ALR</sup>).

**f** Mitochondrial membrane potential were evaluated in the same primary lymphocyte samples as **e**. The geometric means of TMRE in MitoTrackerGreen positive viable cell population was taken as the mitochondrial membrane potential (MMP) value. The fold change of MMP by activation was significantly less in B6-*mt*<sup>ALR</sup> lymphocytes than B6-*mt*<sup>BPL</sup> cells. descriptive  $p = 0.0445$ ,  $t$  test.

**Fig. 3: The mutation in *mt-Nd2* is associated with alteration of tryptophan levels.**

**a** A ratio of NAD<sup>+</sup> to NADH was measured in liver tissues of young (3 months old) female B6-*mt*<sup>BPL</sup> and B6-*mt*<sup>ALR</sup> mice. No difference was observed (descriptive  $p = 0.3737$ ,  $t$  test).  $N = 9$ /strain.

**b** A region of the NMR spectra of a well-separated signal of tryptophan in B6-*mt*<sup>ALR</sup> fibroblast cell line (red) and B6-*mt*<sup>BPL</sup> fibroblast cell line (black) is displayed.  $N = 5$  (B6-*mt*<sup>ALR</sup> cell lines),  $n = 7$  (B6-*mt*<sup>BPL</sup> cell lines).

**c** Tryptophan levels identified in **b** were quantified and compared between the groups. The mean value of the two signals were compared. Descriptive  $p = 0.0295$ ,  $t$  test.

**Fig. 4: Transcriptome analysis revealed mitochondrial and age-related pathways were affected by the *mt-Nd2* mutation.**

**a** Differentially expressed genes between B6-*mt*<sup>ALR</sup> and B6-*mt*<sup>BPL</sup> mice. The volcano plot shows the effect size versus the  $-\log_{10}$  *P*-value of differentially regulated genes. Genes with the expression levels  $p < 0.01$  were plotted in red. N=4/strain, female.

**b** Hallmark pathway analysis show the pathways up-regulated in B6-*mt*<sup>ALR</sup> mice (left) and up-regulated in B6-*mt*<sup>BPL</sup> mice (right).

**Fig. 5: The B6-*mt*<sup>ALR</sup> mice exhibited higher susceptibility to diet-induced glucose intolerance.**

**a.** Female mice were fed with high fat diet (60kJ% fat, n=8/strain) or control diet (13kJ% fat, n=3/strain) for 8 weeks starting at 4 weeks of age. Body mass and weight gain due to the high fat diet were unaltered between strains. HFD; high fat diet, CD; control diet. BPL=B6-*mt*<sup>BPL</sup>, ALR=B6-*mt*<sup>ALR</sup>.

**b** Intraperitoneal glucose tolerance test was conducted after 8 weeks of feeding. B6-*mt*<sup>ALR</sup> mice exhibited impaired glucose tolerance compared to B6-*mt*<sup>BPL</sup>. Main effect of strains: descriptive  $p=0.0238$ , interaction between strains and time: descriptive  $p < 0.0001$ , two-way non-parametric analysis of variance.

**c** Levels of glucose and insulin were determined in morning-fasted serum samples obtained HFD-fed B6-*mt*<sup>BPL</sup> and B6-*mt*<sup>ALR</sup> mice.

**d** Lipid profiles were measured in the same samples as tested in **c**. Cholesterol, descriptive  $p=0.0057$ ; HDL, descriptive  $p=0.0038$ ; HDL/LDL, descriptive  $p=0.0054$ ; FFA, descriptive  $p=0.0115$ ; *t* test. HDL, high-density lipoprotein; LDL, low-density lipoprotein; FFA, free fatty acids.

**e, f** Primary hepatocyte prepared from mice fed with HFD demonstrated the levels of basal respiration and OXPHOS-linked ATP production were lower in hepatocytes from B6- $mt^{ALR}$  than those from B6- $mt^{BPL}$ . Descriptive  $p=0.0389$  (**e**), descriptive  $p=0.0446$  (**f**),  $t$  test.

## Figures

Fig. 1

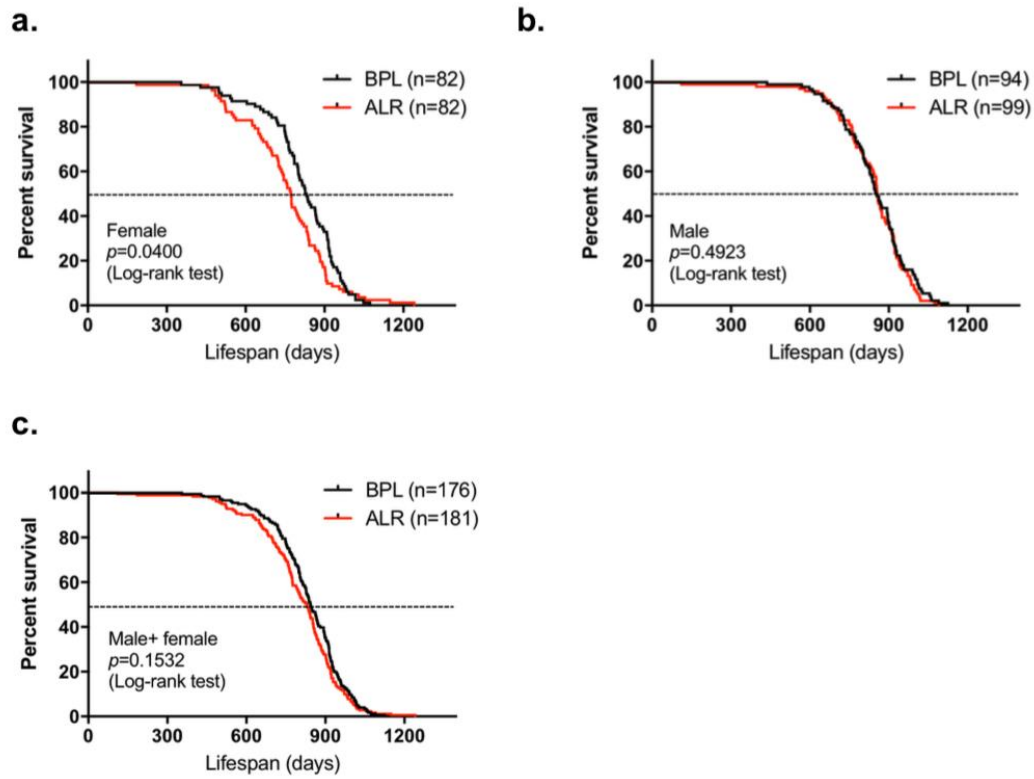



**Fig. 2**

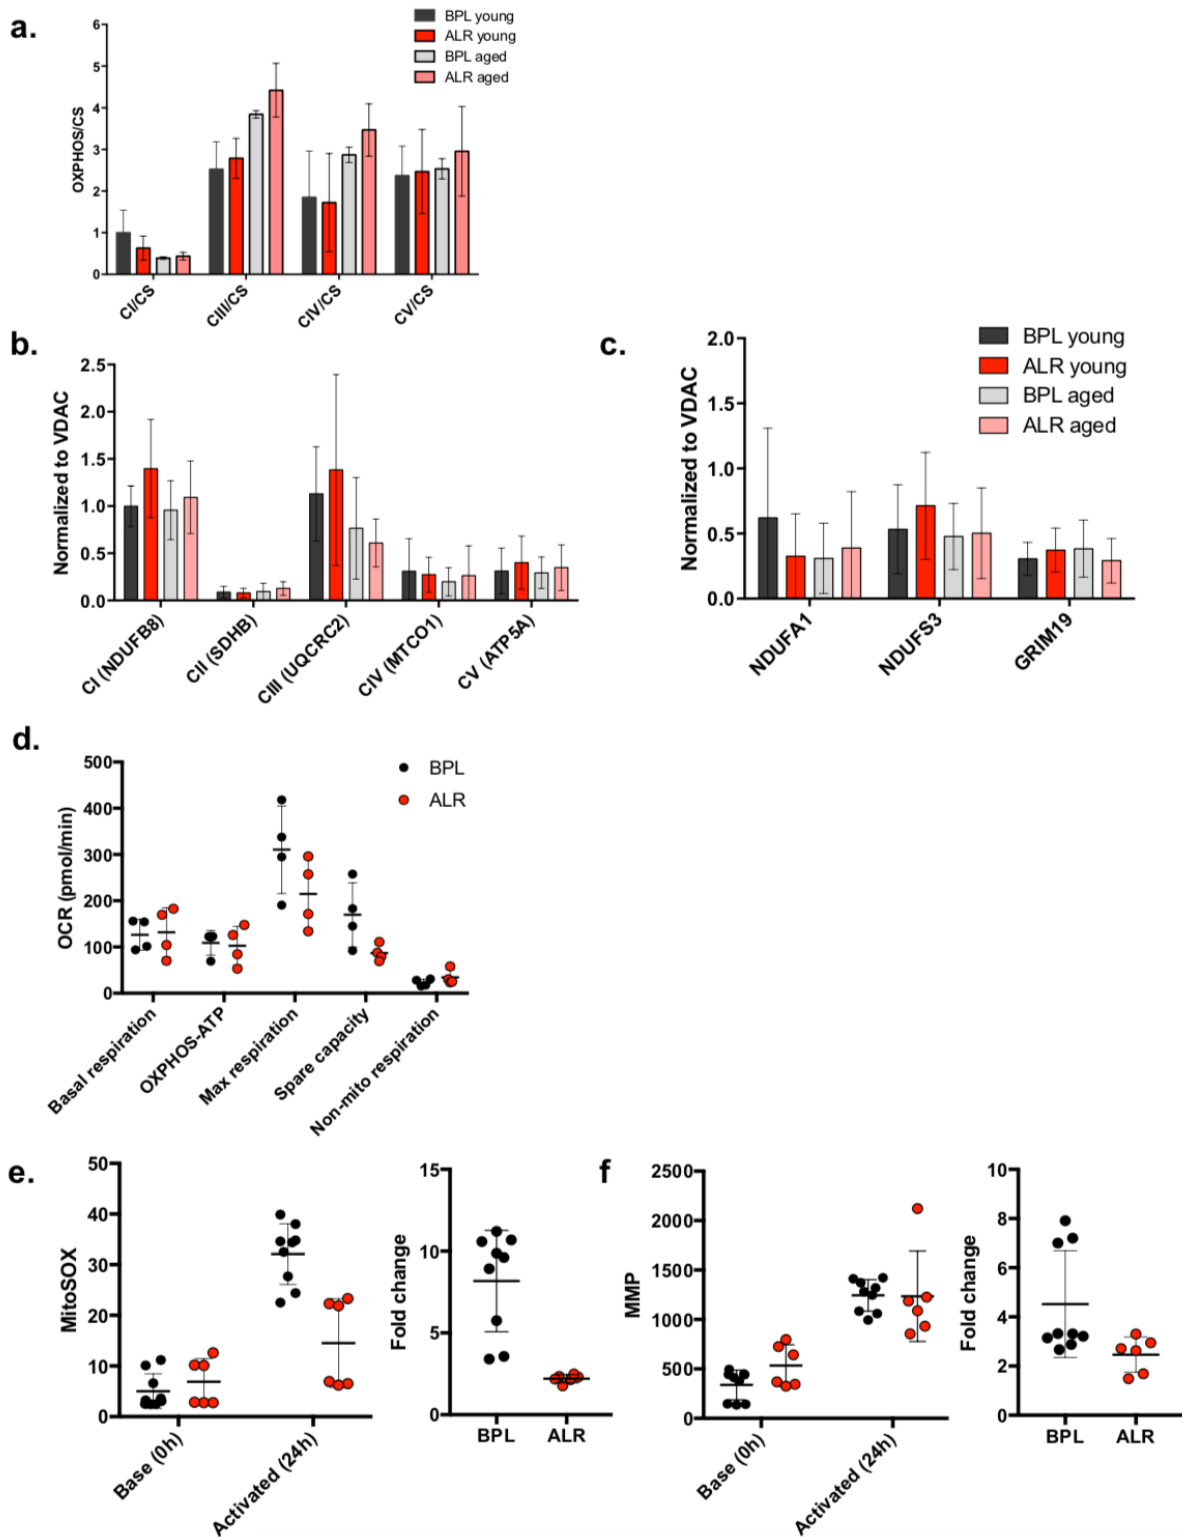

**Fig. 3**

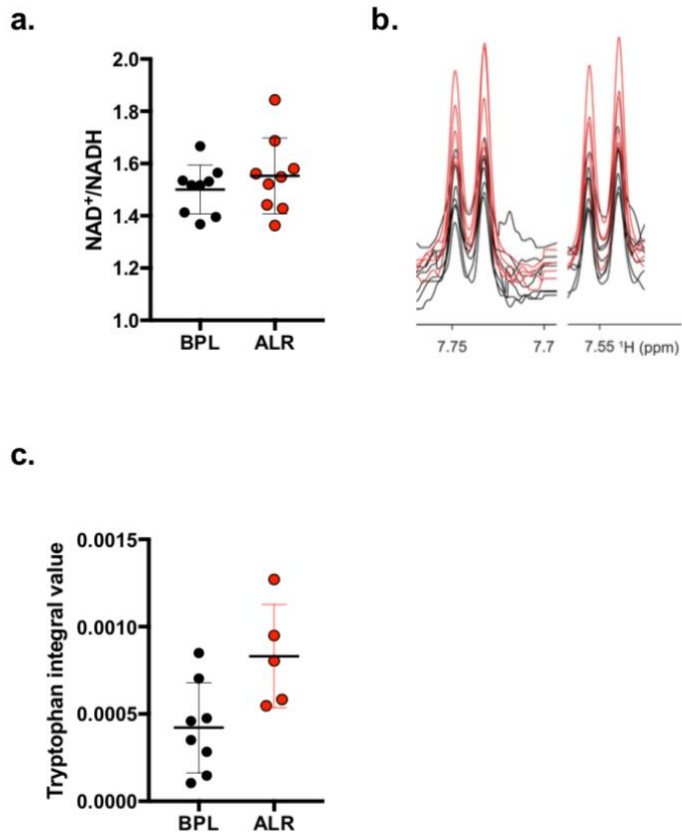

**Fig. 4**

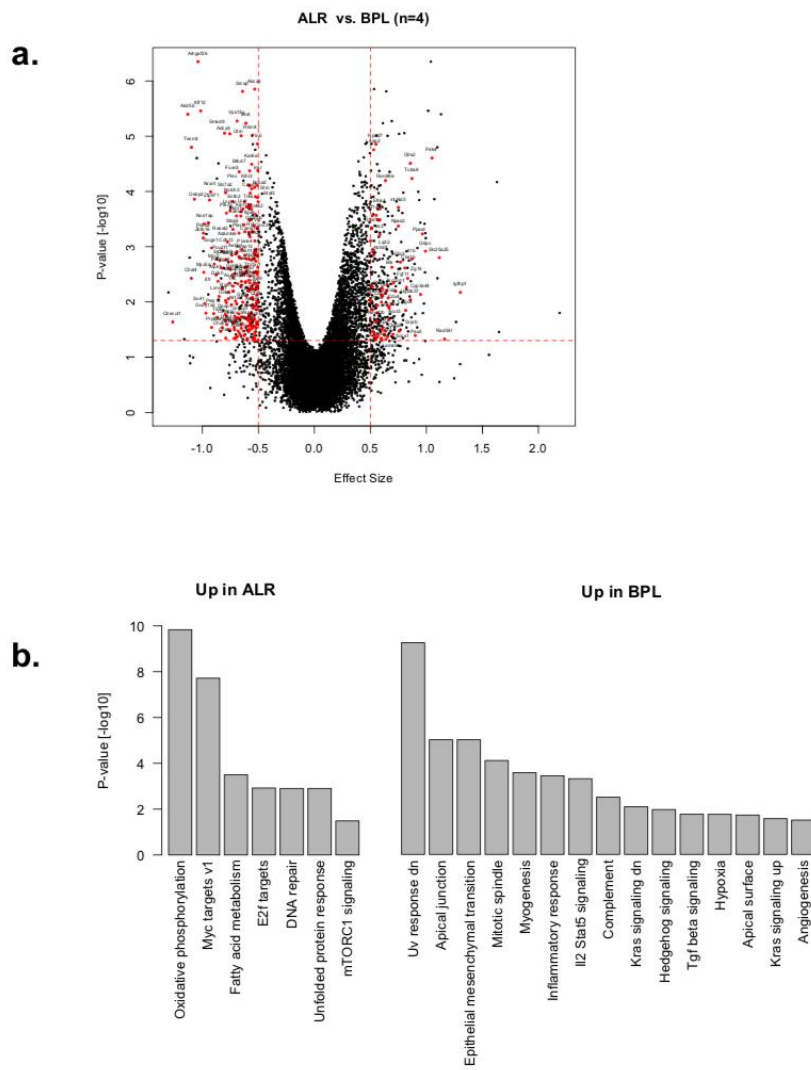

Fig. 5

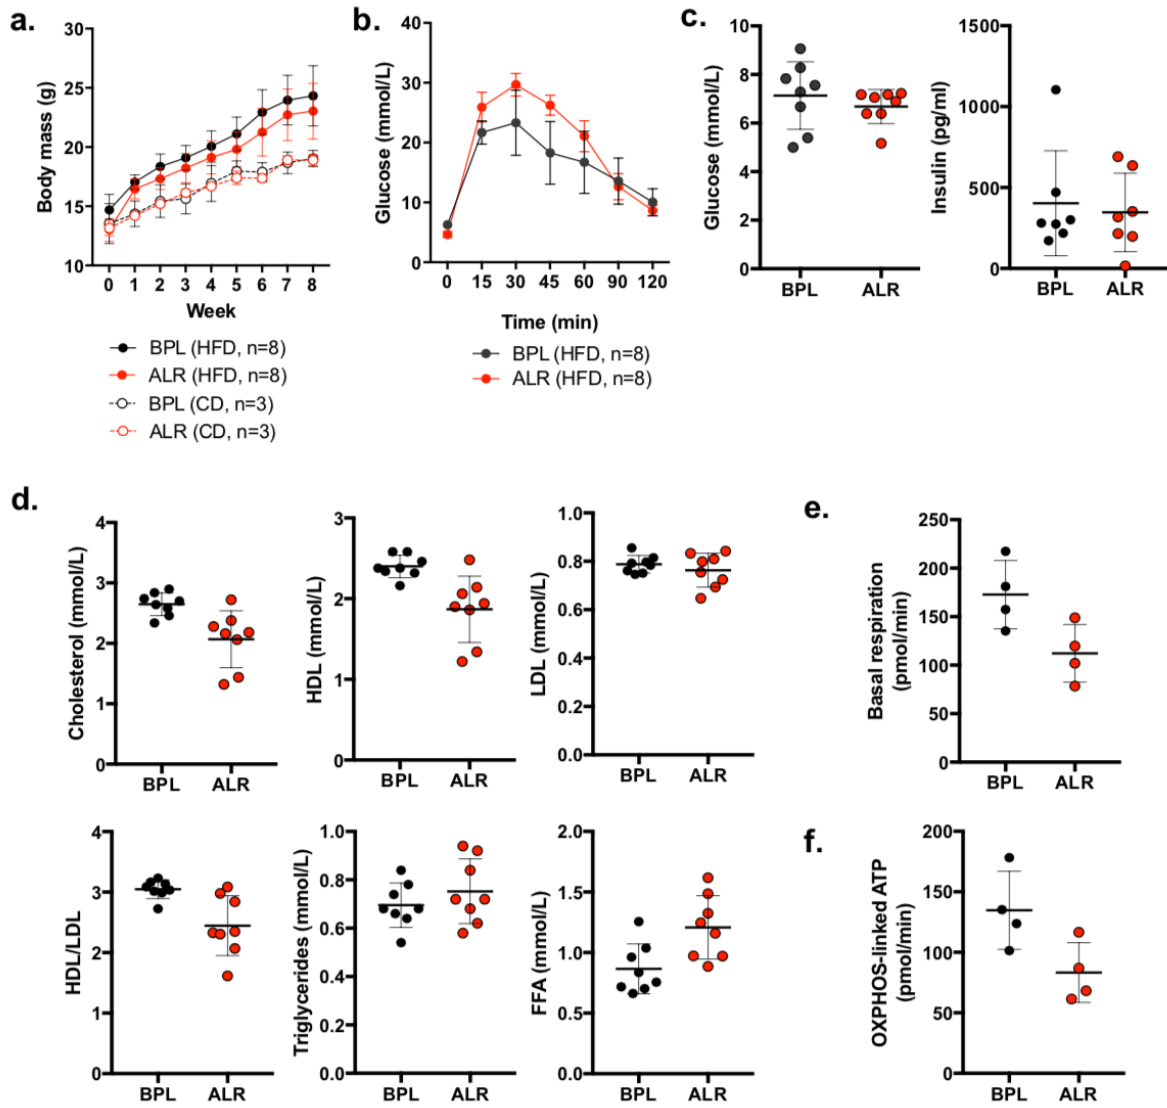

Source: https://biorxiv.org/content/biorxiv/early/2018/11/16/472092.full-text.pdf
